# Supplementary material for: Genome-Wide Identification and Expression Analysis of the Starch Synthase Gene Family in Sweet Potato and Two of Its Closely Related Species
Source: MDPI journal article supplement (doi:10.3390/genes15040400), 2024-03-25
Supplement: s1 [file s1]

**Table S1 The primer sequences for qPCR of sweet potato SS genes.**

| <b>Primer name</b> | <b>Forward Primer (5'→3')</b> | <b>Reverse Primer (5'→3')</b> |
|--------------------|-------------------------------|-------------------------------|
| <i>IbSS1</i>       | TGTGGACATTTTGAAGCGCA          | AACTCTCCATAGCAACCGCC          |
| <i>IbSS2</i>       | GCCTGTGAAGCTCCGTTAGT          | CATTGTGCGGGCGATACTTG          |
| <i>IbSS3</i>       | CCTTGCAAAAGCACCTTGGG          | ACAAACTGGAGACCCCTCCT          |
| <i>IbSS4</i>       | AACGTGTGAAAGCTACGGGT          | TCTTTCAGCAATCTGTCTGGAGT       |
| <i>IbSS5</i>       | TCAAGGAAACTGGAGAACGCA         | TCTTCCTGAGATGCAGCAAGTT        |
| <i>IbSS6</i>       | CGAGGCACCGAGAGTTTGA           | GAAAGCAACCTTGGCGTTCA          |
| <i>IbSS7</i>       | GCAATAAAGCGGGTGGAGGA          | AGGATACGGATGCTGGAACC          |
| <i>IbSS8</i>       | GGAGGCCTTGGTGATGTTGT          | AGTTCCACCCCAAGAGTAGC          |
| <i>IbARF</i>       | CTTTGCCAAGAAGGAGATGC          | TCTTGTCCTGACCACCAACA          |
